# Supplementary material for: Not all protein-mediated single-wall carbon nanotube dispersions are equally bioactive
Source: Royal Society of Chemistry journal article supplement (doi:10.1039/c2nr31928d), 2012-01-01
Supplement: c2nr31928d.pdf [file c2nr31928d.pdf]

Supplementary Material (ESI) for Nanoscale  
This journal is © The Royal Society of Chemistry 2012

## 5 **Not All Protein-Mediated Single-Wall Carbon Nanotube Dispersions Are Equally Bioactive†**

**Brian D. Holt,<sup>a</sup> Mary C. McCorry,<sup>b</sup> Patrick D. Boyer,<sup>c</sup> Kris Noel Dahl<sup>\*a,c</sup> and Mohammad F. Islam<sup>\*b</sup>**

<sup>10</sup> <sup>a</sup> Department of Biomedical Engineering, Carnegie Mellon University, 5000 Forbes Avenue, Pittsburgh, PA 15213, USA.

<sup>b</sup> Department of Materials Science & Engineering, Carnegie Mellon University, 5000 Forbes Avenue, Pittsburgh, PA 15213, USA.

<sup>15</sup> <sup>c</sup> Department of Chemical Engineering, Carnegie Mellon University, 5000 Forbes Avenue, Pittsburgh, PA 15213, USA.

\* Corresponding Authors:

<sup>20</sup> Prof. Mohammad F. Islam  
Department of Materials Science & Engineering  
Carnegie Mellon University  
5000 Forbes Avenue  
<sup>25</sup> Pittsburgh, PA 15213, USA  
E-mail: mohammad@andrew.cmu.edu  
Phone: (412) 268-8999  
Fax: (412) 268-7596

Prof. Kris Noel Dahl  
Department of Biomedical Engineering  
Department of Chemical Engineering  
Carnegie Mellon University  
5000 Forbes Avenue  
Pittsburgh, PA 15213, USA  
E-mail: kndahl@andrew.cmu.edu  
Phone: (412) 268-9609  
Fax: (412) 268-7139

<sup>30</sup>

**Table S1.** Summary of calculated protein secondary structure (using DichroWeb<sup>1, 2</sup>) from circular dichroism data of SWCNTs–protein dispersions generated with varying sonication time.

5

| Protein | Son. Time [h] | Helix | Beta  | Turn  | Random | Total | Helix [% Δ] | Beta [% Δ] | Turn [% Δ] | Random [% Δ] |
|---------|---------------|-------|-------|-------|--------|-------|-------------|------------|------------|--------------|
| BSA     | 0             | 0.677 | 0.020 | 0.123 | 0.182  | 1.00  | 0.00        | 0.00       | 0.00       | 0.00         |
| BSA     | 1             | 0.657 | 0.024 | 0.132 | 0.188  | 1.00  | -2.95       | 20.0       | 7.32       | 3.30         |
| BSA     | 2             | 0.598 | 0.032 | 0.153 | 0.217  | 1.00  | -11.7       | 60.0       | 24.4       | 19.2         |
| BSA     | 4             | 0.628 | 0.028 | 0.138 | 0.207  | 1.00  | -7.24       | 40.0       | 12.2       | 13.7         |
| BSA     | 6             | 0.605 | 0.031 | 0.151 | 0.215  | 1.00  | -10.6       | 55.0       | 22.8       | 18.1         |
| BSA     | 12            | 0.572 | 0.033 | 0.172 | 0.225  | 1.00  | -15.5       | 65.0       | 39.8       | 23.6         |
| LSZ     | 0             | 0.445 | 0.093 | 0.212 | 0.252  | 1.00  | 0.00        | 0.00       | 0.00       | 0.00         |
| LSZ     | 1             | 0.394 | 0.120 | 0.220 | 0.268  | 1.00  | -11.5       | 29.0       | 3.77       | 6.35         |
| LSZ     | 2             | 0.405 | 0.111 | 0.223 | 0.263  | 1.00  | -8.99       | 19.4       | 5.19       | 4.37         |
| LSZ     | 4             | 0.401 | 0.118 | 0.216 | 0.267  | 1.00  | -9.89       | 26.9       | 1.89       | 5.95         |
| LSZ     | 6             | 0.376 | 0.137 | 0.220 | 0.268  | 1.00  | -15.5       | 47.3       | 3.77       | 6.35         |
| LSZ     | 12            | 0.365 | 0.139 | 0.223 | 0.274  | 1.00  | -18.0       | 49.5       | 5.19       | 8.73         |

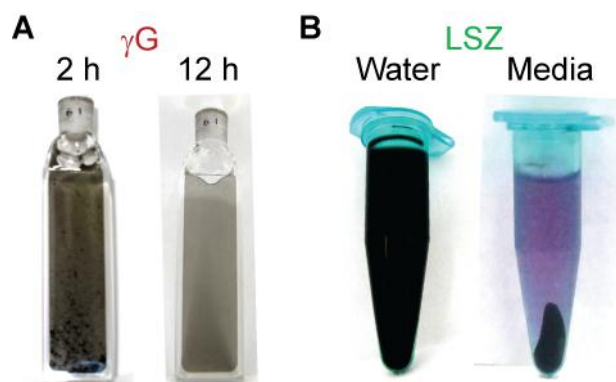

**Fig. S1** Stability of SWCNTs dispersed using  $\gamma$ G and LSZ in water and cell culture media. (A) SWCNTs- $\gamma$ G formed clusters in water within a few hours after 2 h sonication. Clustering of SWCNTs- $\gamma$ G reduced significantly after sonicating the dispersion for 12 h. The clustering of SWCNTs- $\gamma$ G did not get affected when mixed with cell culture media. See the text for more details. (B) SWCNTs-LSZ were stable in water but flocculated and sedimented to the bottom of the centrifuge tube when mixed with cell culture media.

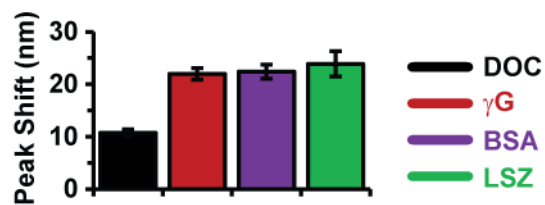

**Fig. S2** Absorbance peak shifts of SWCNTs-protein dispersions based on prominent absorbance peaks within the wavelength range of 1105 – 1315 nm relative to the empirically determined Kataura plot.<sup>3</sup> The magnitude of the NIR fluorescence emission peak shifts, shown in Figure 1D, was similar to the NIR absorbance peak shifts.

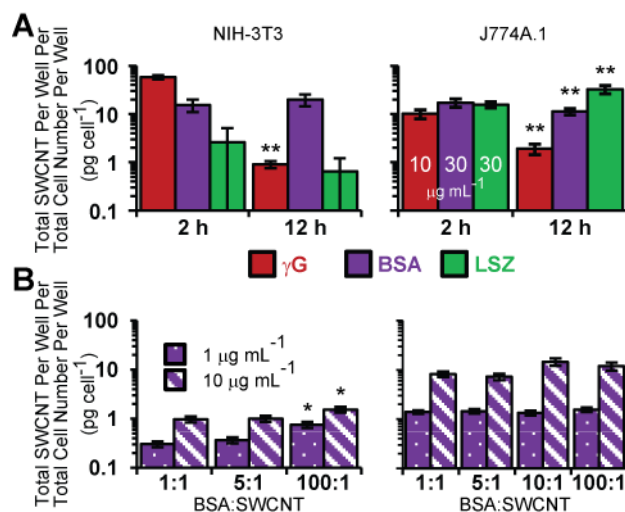

**Fig. S3** Quantification of the sonication time and protein:SWCNT effects on cell association of SWCNTs. (A) Drastic differences in cell-associated SWCNTs for 2 *versus* 12 h sonicated SWCNTs–LSZ and SWCNTs–γG dispersions were likely confounded due to aggregation and nonspecific adsorption. See text for more detail; BSA data from Figure 6 is included for comparison. (B) Quantification of SWCNTs–BSA cellular uptake into NIH-3T3 murine fibroblasts and J774A.1 murine macrophage-like cells at two different dosage of BSA:SWCNTs. \*  $p < 0.05$  for 100:1 compared to both 5:1 and 1:1 of same concentration and \*\*  $p < 0.01$  for 12 h compared to 2 h of same protein.

## References

- 1 L. Whitmore and B. A. Wallace, *Nucleic Acids Res.*, 2004, **32**, W668–W673.
- 5 2 L. Whitmore and B. A. Wallace, *Biopolymers*, 2008, **89**, 392–400.
- 3 R. B. Weisman and S. M. Bachilo, *Nano Lett.*, 2003, **3**, 1235–1238.
